# Supplementary material for: An unnatural base pair system for efficient PCR amplification and functionalization of DNA molecules
Source: PubMed Central journal article supplement — Nucleic Acids Res. 2008 Dec 10;37(2):e14. doi: 10.1093/nar/gkn956 (PMC2632903; doi:10.1093/nar/gkn956), 2008-12-10
Supplement: gkn956_1.pdf [file gkn956_1.pdf]

**Supplementary Information for:**

## **DNA amplification and functionalization PCR by an unnatural base pair system**

Michiko Kimoto<sup>1,2</sup>, Rie Kawai<sup>1</sup>, Tsuneo Mitsui<sup>2</sup>, Shigeyuki Yokoyama<sup>1,3</sup>, Ichiro Hirao<sup>1,2\*</sup>

<sup>1</sup>Systems and Structural Biology Center, RIKEN, and <sup>2</sup>TagCyx Biotechnologies, 1-7-22 Suehiro-cho, Tsurumi-ku, Yokohama, Kanagawa 230-0045, Japan, <sup>3</sup>Department of Biophysics and Biochemistry, Graduate School of Science, The University of Tokyo, 7-3-1 Hongo, Bunkyo-ku, Tokyo 113-0033, Japan

### **CONTENTS**

#### **Supplementary Methods**

**Chemical synthesis of NH<sub>2</sub>-hx-dPxTP and FAM-hx-dPxTP**

**Single-nucleotide insertion experiments of the Ds-Px pairing**

**Supplementary Table 1. Steady-state kinetic parameters of single-nucleotide insertion experiments of the Ds-Px pairing**

**Supplementary Table 2. Sequences of chemically synthesized DNA fragments**

**Supplementary Table 3. PCR amplification of DNA fragments involving the Ds-Px pair**

**Supplementary Figure 1. Selected sequences of 66 clones obtained from the library after five rounds of *in vitro* selection**

## Supplementary Methods

### Chemical synthesis of NH<sub>2</sub>-hx-dPxTP and FAM-hx-dPxTP

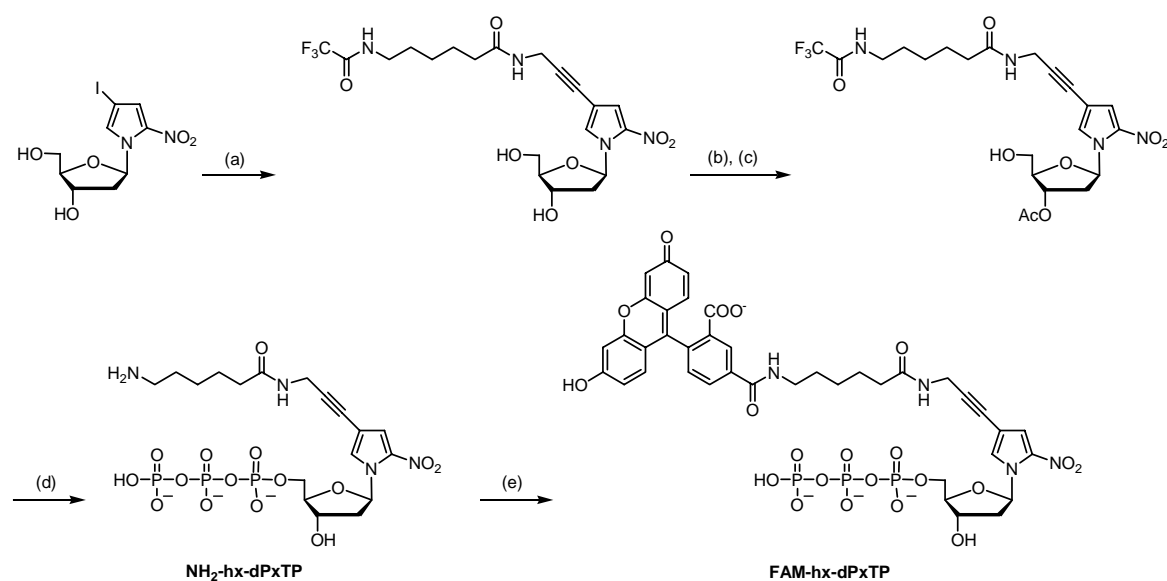

Conditions: (a) CuI, Pd[P(C<sub>6</sub>H<sub>5</sub>)<sub>3</sub>]<sub>4</sub>, DMF, triethylamine, room temperature, then *N*-(2-propynyl)-6-trifluoroacetamido-hexanamide; (b) DMTr-Cl, pyridine, room temperature; (c) acetic anhydride, pyridine, room temperature, then dichloroacetic acid, dichloromethane, 0 °C; (d) 2-chloro-4*H*-1,3,2-benzodioxaphosphorin-4-one/dioxane, pyridine, tri-*n*-butylamine, bis(tri-*n*-butylammonium)pyrophosphate, DMF, then I<sub>2</sub>/pyridine/H<sub>2</sub>O, H<sub>2</sub>O, NH<sub>4</sub>OH, room temperature; (e) FAM-*N*-hydroxysuccinimidyl ester/DMF, 0.1 M NaHCO<sub>3</sub>-Na<sub>2</sub>CO<sub>3</sub> buffer (pH 8.5), room temperature, then NH<sub>4</sub>OH.

### 1-(2-Deoxy-β-D-ribofuranosyl)-4-[3-(6-trifluoroacetamido-hexanamido)-1-propynyl]-2-nitropyrrole.

1-(2-Deoxy-β-D-ribofuranosyl)-4-iodo-2-nitropyrrole (354 mg, 1 mmol) was co-evaporated with dry CH<sub>3</sub>CN twice. The residue was dissolved in DMF (5.0 ml) with CuI(I) (31 mg, 160 μmol) and Pd[P(C<sub>6</sub>H<sub>5</sub>)<sub>3</sub>]<sub>4</sub> (58 mg, 50 μmol), followed by triethylamine (210 μl, 1.5 mmol), and the mixture was stirred in the dark at room temperature. To the solution,

*N*-(2-propynyl)-6-trifluoroacetamidohexanamide (396 mg, 1.5 mmol) in DMF (4 ml) was added dropwise, and the solution was stirred overnight at room temperature. The reaction mixture was concentrated *in vacuo*. The product was purified from the residue by silica gel column chromatography (5-10% CH<sub>3</sub>OH in CH<sub>2</sub>Cl<sub>2</sub>) and C18-HPLC (39-41% CH<sub>3</sub>CN in H<sub>2</sub>O, 15 min) to give the title compound (408 mg, 83%) as the β isomer.

<sup>1</sup>H NMR (300 MHz, DMSO-*d*<sub>6</sub>) δ 9.39 (brs, 1H), 8.29 (t, 1H, *J* = 5.4 Hz), 7.96 (d, 1H, *J* = 2.2 Hz), 7.31 (d, 1H, *J* = 2.2 Hz), 6.55 (t, 1H, *J* = 5.8 Hz), 5.29 (d, 1H, *J* = 4.5 Hz), 5.12 (t, 1H, *J* = 5.1 Hz), 4.24 (m, 1H), 4.06 (d, 2H, *J* = 5.4 Hz), 3.85 (m, 1H), 3.70-3.53 (m, 2H), 3.16 (m, 2H), 2.48-2.40 (m, 1H), 2.28-2.20 (m, 1H), 2.09 (t, 2H, *J* = 7.5 Hz), 1.55-1.42 (m, 4H), 1.28-1.18 (m, 2H). HRMS (FAB, 3-NBA matrix) for C<sub>20</sub>H<sub>26</sub>F<sub>3</sub>N<sub>4</sub>O<sub>7</sub> [M + H]<sup>+</sup>: calcd, 491.1754; found, 491.1761.

**1-(2-Deoxy-3-*O*-acetyl-β-D-ribofuranosyl)-4-[3-(6-trifluoroacetamidohexanamido)-1-propynyl]-2-nitropyrrole.**

1-(2-Deoxy-β-D-ribofuranosyl)-4-[3-(6-trifluoroacetamidohexanamido)-1-propynyl]-2-nitropyrrole (394 mg, 803 μmol) was co-evaporated with dry pyridine three times. The residue was dissolved in pyridine (4 ml) with 4,4'-dimethoxytrityl chloride (286 mg, 844 μmol), and the solution was stirred at room temperature for 2.5 h. The solution was partitioned with EtOAc and H<sub>2</sub>O. The organic layer was washed with a saturated NaHCO<sub>3</sub> solution, dried with MgSO<sub>4</sub>, and evaporated *in vacuo*. The residue was purified by silica gel column chromatography (0-0.5% CH<sub>3</sub>OH in CH<sub>2</sub>Cl<sub>2</sub>) to obtain the dimethoxytrityl derivative (543 mg). 1-(2-Deoxy-5-*O*-dimethoxytrityl-β-D-ribofuranosyl)-4-[(3-(6-trifluoroacetamidohexanamido)-1-propynyl)-2-nitropyrrole (542 mg, 684 μmol) was co-evaporated with dry pyridine three times. To the residue in pyridine (7 ml) was added acetic anhydride (169 μl, 1.79 mmol). The mixture was stirred overnight at room temperature. The solution was partitioned with EtOAc and a saturated NaHCO<sub>3</sub> solution. The organic layer was washed with brine, dried with

**Supplementary Online Information Kimoto *et al.***

MgSO<sub>4</sub>, and evaporated *in vacuo*. To the residue in dichloromethane (68 ml) was added dichloroacetic acid (680 μl), and the solution was stirred at 0 °C for 15 min. The reaction mixture was poured into a saturated NaHCO<sub>3</sub> solution, and was extracted with CH<sub>2</sub>Cl<sub>2</sub>. The combined organic layer was dried with MgSO<sub>4</sub> and evaporated *in vacuo*. The product (328 mg, 77%, 2 steps) was purified by silica gel column chromatography (2% CH<sub>3</sub>OH in CH<sub>2</sub>Cl<sub>2</sub>).

<sup>1</sup>H NMR (300 MHz, DMSO-*d*<sub>6</sub>) δ 9.39 (brs, 1H), 8.30 (t, 1H, J = 5.4 Hz), 7.94 (d, 1H, J = 2.2 Hz), 7.33 (d, 1H, J = 2.2 Hz), 6.61 (t, 1H, J = 6.4 Hz), 5.26 (brs, 1H), 5.22 (m, 1H), 4.13 (m, 1H), 4.06 (d, 2H, J = 5.4 Hz), 3.64 (m, 2H), 3.16 (t, 2H, J = 7.0 Hz), 2.62 (ddd, 1H, J = 3.0, 6.0, 14.2 Hz), 2.43 (m, 1H), 2.10 (m, 2H), 2.07 (s, 3H), 1.49 (m, 4H), 1.24 (m, 2H). HRMS (FAB, 3-NBA matrix) for C<sub>22</sub>H<sub>28</sub>F<sub>3</sub>N<sub>4</sub>O<sub>8</sub> [M + H]<sup>+</sup>: calcd, 533.1859; found, 533.1907.

**1-(2-Deoxy-β-D-ribofuranosyl)-4-[3-(6-aminohexanamido)-1-propynyl]-2-nitropyrrole 5'-triphosphoric acid (NH<sub>2</sub>-hx-dPxTP).**

1-(2-Deoxy-3-*O*-acetyl-β-D-ribofuranosyl)-4-[3-(6-trifluoroacetamido)hexanamido)-1-propynyl]-2-nitropyrrole (53 mg, 100 μmol) was co-evaporated with dry pyridine three times. The residue was dissolved in pyridine (100 μl) and dioxane (300 μl). A 1 M solution of 2-chloro-4*H*-1,3,2-benzodioxaphosphorin-4-one in dioxane (110 μl, 110 μmol) was added to the solution, and then the reaction mixture was stirred at room temperature for 10 min. Tri-*n*-butylamine (100 μl) was added to the reaction mixture, followed by a 0.5 M solution of bis(tri-*n*-butylammonium)pyrophosphate in DMF (300 μl). After 10 min, 1% iodine in pyridine/H<sub>2</sub>O (98/2, v/v) (2.0 ml) was then added. After stirring for 15 min, the oxidation was quenched by the addition of a 5% aqueous solution of NaHSO<sub>3</sub> (150 μl). The reaction mixture was then evaporated *in vacuo*, and the residue was dissolved in H<sub>2</sub>O (5 ml). After stirring for 30 min, concentrated ammonia (20 ml) was added to the solution, and the reaction mixture was stirred for 8 h and lyophilized. The product (18 μmol, 18%) was purified by DEAE Sephadex A-25 column chromatography (1.5 cm x 30 cm, eluted by a linear gradient from 50

**Supplementary Online Information Kimoto *et al.***

mM to 1 M TEAB) and by C18 HPLC (eluted by a linear gradient of CH<sub>3</sub>CN in 100 mM TEAA, pH 7.0).

<sup>1</sup>H NMR (300 MHz, D<sub>2</sub>O) δ 7.79 (s, 1H), 7.31 (s, 1H), 6.68 (t, 1H, J = 5.7 Hz), 4.56 (m, 1H), 4.16 (m, 3H), 4.07 (s, 2H), 3.13 (q, 18H, J = 7.3 Hz), 2.90 (t, 2H, J = 7.6 Hz), 2.58 (m, 1H), 2.42 (m, 1H), 2.24 (t, 2H, J = 7.0 Hz), 1.60 (m, 4H), 1.33 (m, 2H), 1.20 (t, 27H, J = 7.3 Hz).

<sup>31</sup>P NMR (121 MHz, D<sub>2</sub>O) δ -8.26 (1P), -10.51 (1P), -22.05 (1P).

MS (ESI) for C<sub>18</sub>H<sub>28</sub>N<sub>4</sub>O<sub>15</sub>P<sub>3</sub>, [M-H]<sup>-</sup>: calcd, 633.08; found, 632.99. UV (10 mM sodium phosphate buffer, pH 7.0) ε 368 = 11,100.

**1-(2-Deoxy-β-D-ribofuranosyl)-4-[3-(6-fluorescein-5-carboxamidohexanamido)-1-propynyl]-2-nitropyrrole 5'-triphosphoric acid (FAM-hx-dPxTP).**

A 0.1 M NaHCO<sub>3</sub>-Na<sub>2</sub>CO<sub>3</sub> buffer solution (pH 8.5, 0.72 ml) of NH<sub>2</sub>-hx-dPxTP (6 μmol) was reacted with 5-carboxyfluorescein *N*-hydroxysuccinimidyl ester (FAM-SE) (3.7 mg, 7.8 μmol) in DMF (500 μl) in the dark at room temperature. After 8 h, the reaction mixture was treated with concentrated ammonia (0.5 ml) for 5 min. The product (3.2 μmol, 53%) was purified by DEAE Sephadex A-25 column chromatography (1.5 cm x 30 cm, eluted by a linear gradient from 50 mM to 1 M TEAB) and C18 HPLC (eluted by a linear gradient of CH<sub>3</sub>CN in 100 mM TEAA, pH 7.0).

<sup>1</sup>H NMR (300 MHz, D<sub>2</sub>O) δ 8.29 (s, 1H), 8.04 (d, 1H, J = 7.4 Hz), 7.58 (brs, 1H), 7.26 (d, 1H, 7.5 Hz), 7.00-6.69 (m, 7H), 6.39 (brs, 1H), 4.40 (m, 1H), 4.03 (m, 3H), 3.94 (s, 2H), 3.41 (m, 2H), 3.12 (q, 18H, J = 7.3 Hz), 2.41 (m, 1H), 2.24 (m, 2H), 2.13 (m, 1H), 1.63 (m, 4H), 1.38 (m, 2H), 1.20 (t, 27H, J = 7.3 Hz).

<sup>31</sup>P NMR (121 MHz, D<sub>2</sub>O) δ -10.86 (2P), -23.13 (1P).

MS (ESI) for C<sub>39</sub>H<sub>38</sub>N<sub>4</sub>O<sub>21</sub>P<sub>3</sub>, [M-H]<sup>-</sup>: calcd, 991.12; found, 990.58. UV (10 mM sodium phosphate buffer, pH 7.0) ε 493 = 64,400.

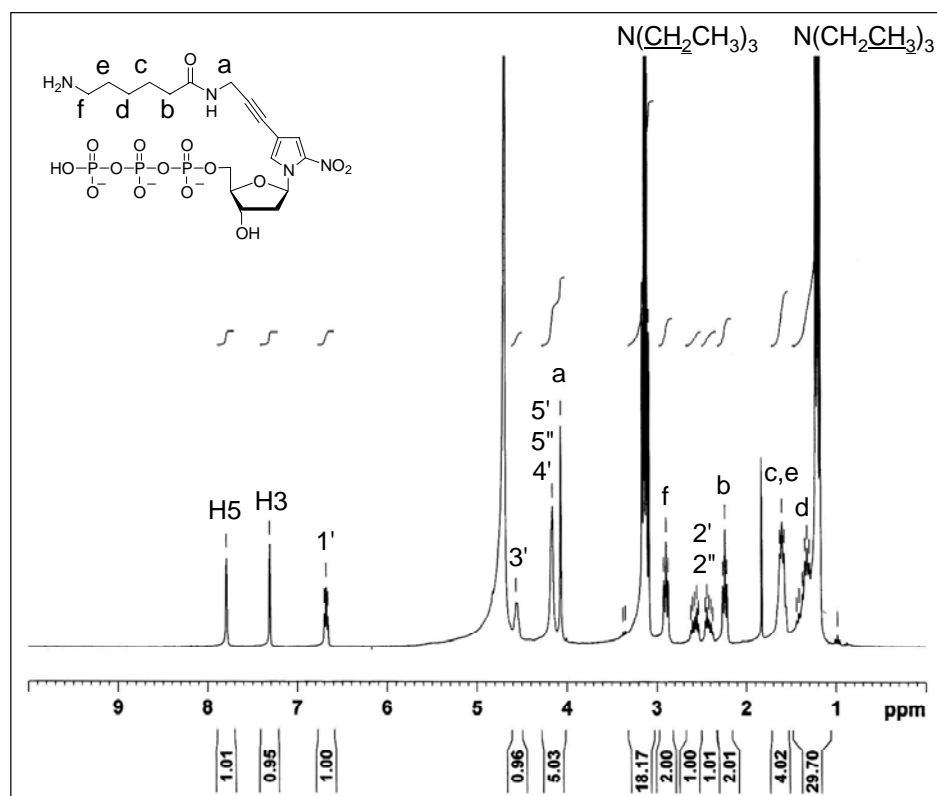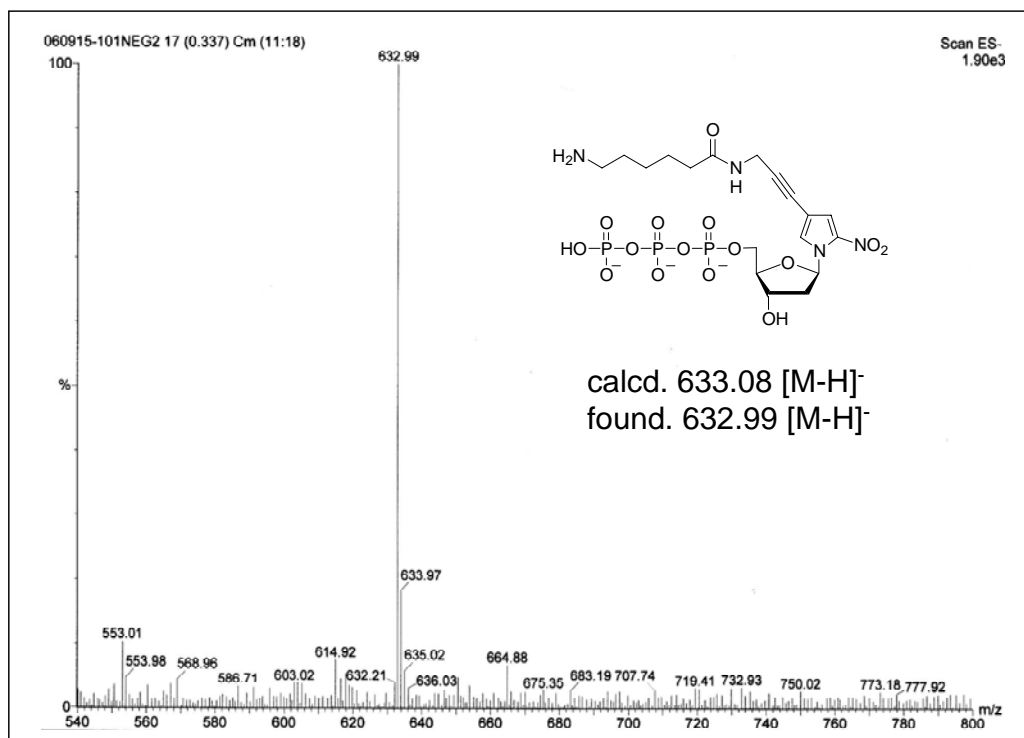

**ESI-mass spectrum of NH<sub>2</sub>-hx-dPxTP**

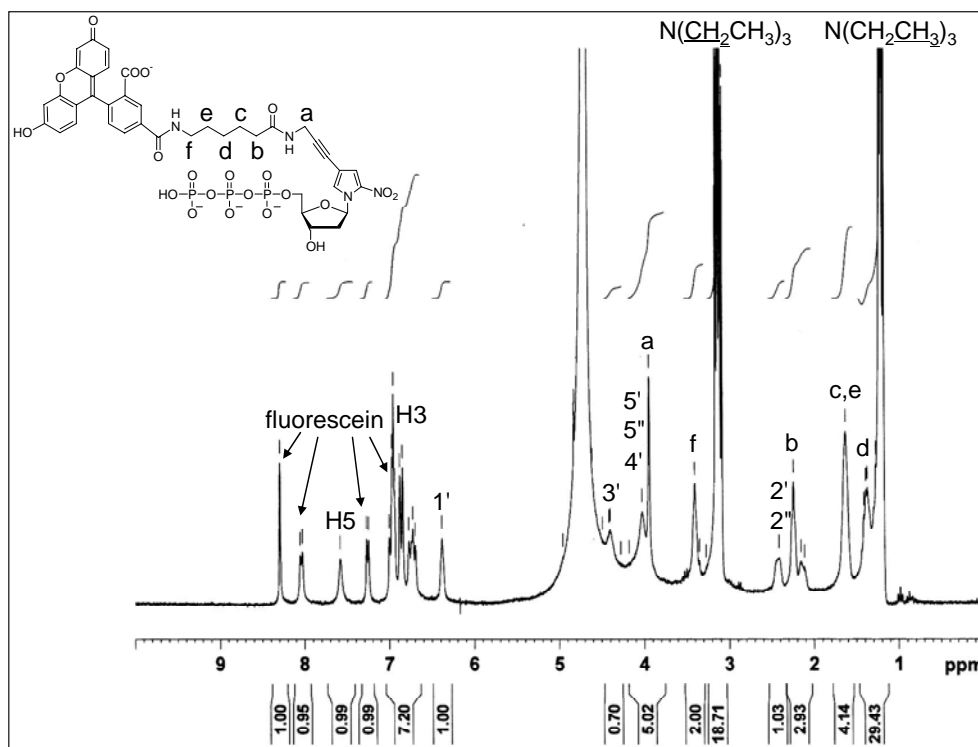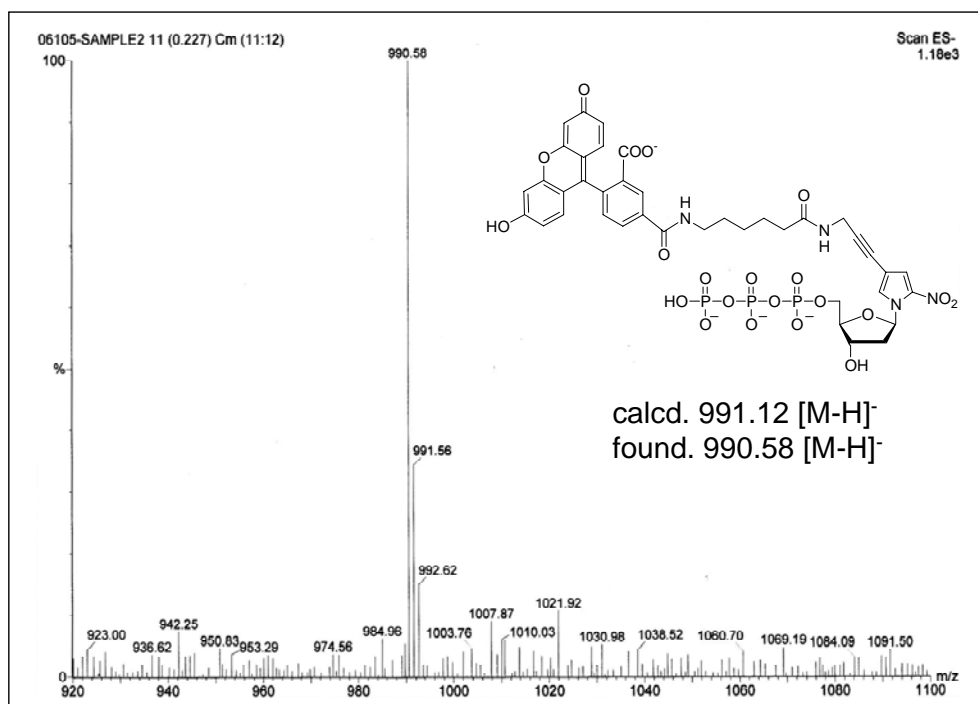

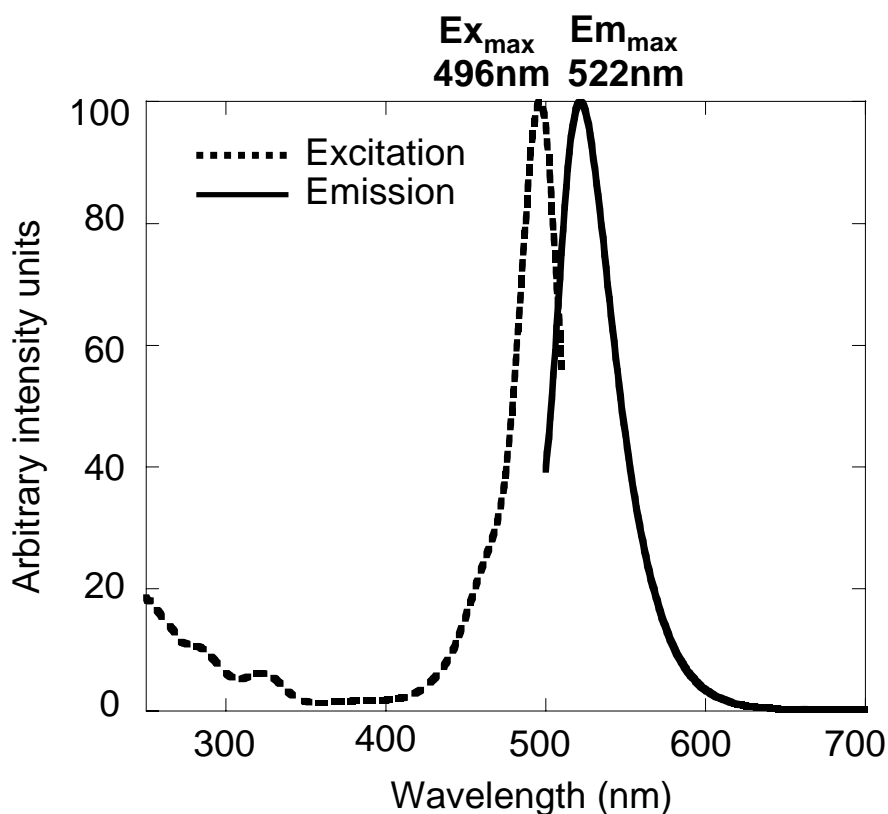

**Excitation and emission spectra of FAM-hx-dPxTP**

### Single-nucleotide insertion experiments of the Ds-Px pairing

A primer (20-mer) labeled with 6-carboxyfluorescein at the 5'-end was annealed with a template (35-mer), in 100 mM Tris-HCl (pH 7.5) buffer containing 20 mM MgCl<sub>2</sub>, 2 mM DTT, and 0.1 mg/ml bovine serum albumin. The primer-template duplex solution (2 or 10 μM, 5 μl) was mixed with 2 μl of an enzyme solution containing the exonuclease-deficient Klenow fragment, KF exo<sup>-</sup> (Amersham USB). The mixture was incubated for more than 2 min, and then the reactions were initiated by adding each dNTP solution (3 μl) to the duplex-enzyme mixture at 37°C. The amount of enzyme used (2–20 nM), the reaction time (1–28.2 min), and the gradient concentration of dNTP (6–600 μM) were adjusted to give reaction extents of 25% or less. The reactions were quenched with 10 μl of stop solution (95% formamide and 20 mM EDTA), and the mixtures were immediately heated at 75°C for 3 min. The diluted products



were analyzed on an automated ABI 377 DNA sequencer equipped with the *GeneScan* software (version 3.0). Relative velocities ( $v_0$ ) were calculated as the extents of the reaction divided by the reaction time, and were normalized to the enzyme concentration (20 nM) and to the duplex concentration (5  $\mu$ M) for the various enzyme and duplex concentrations used. The kinetic parameters ( $K_M$  and  $V_{max}$ ) were obtained from Hanes-Woolf plots of  $[dNTP]/v_0$  against  $[dNTP]$ . The kinetic parameters are listed in Supplementary Table 1.

**Supplementary Table 1. Steady-state kinetic parameters of single-nucleotide insertion experiments of the Ds-Px pairing**

| Primer          |                          | 5'-ACTCACTATAGGGAGGAAGA                |                            |                                      |                                               |
|-----------------|--------------------------|----------------------------------------|----------------------------|--------------------------------------|-----------------------------------------------|
| Template        |                          | 3'-TATTATGCTGAGTGATATCCCTCCTTCTNTCTCGA |                            |                                      |                                               |
| Entry           | Template<br>( <b>N</b> ) | Nucleoside<br>triphosphate             | $K_M$<br>( $\mu\text{M}$ ) | $V_{\max}$<br>(% $\text{min}^{-1}$ ) | Efficiency<br>( $V_{\max}/K_M$ ) <sup>c</sup> |
| 1               | <b>Ds</b>                | NH <sub>2</sub> -hx-d <b>Px</b> TP     | 58 (20) <sup>b</sup>       | 43 (10)                              | $7.4 \times 10^5$                             |
| 2               | A                        | NH <sub>2</sub> -hx-d <b>Px</b> TP     | 100 (21)                   | 2.2 (0.9)                            | $2.2 \times 10^4$                             |
| 3               | G                        | NH <sub>2</sub> -hx-d <b>Px</b> TP     | 69 (14)                    | 0.24 (0.09)                          | $3.5 \times 10^3$                             |
| 4               | C                        | NH <sub>2</sub> -hx-d <b>Px</b> TP     | 160 (90)                   | 0.13 (0.05)                          | $8.1 \times 10^2$                             |
| 5               | T                        | NH <sub>2</sub> -hx-d <b>Px</b> TP     | 250 (110)                  | 10 (4)                               | $4.0 \times 10^4$                             |
| 6 <sup>a</sup>  | <b>Ds</b>                | d <b>Pn</b> TP                         | 91 (6)                     | 34 (5)                               | $3.7 \times 10^5$                             |
| 7 <sup>a</sup>  | A                        | d <b>Pn</b> TP                         | 130 (60)                   | 2.7 (1.2)                            | $2.1 \times 10^4$                             |
| 8 <sup>a</sup>  | G                        | d <b>Pn</b> TP                         | 80 (56)                    | 1.1 (0.4)                            | $1.4 \times 10^4$                             |
| 9 <sup>a</sup>  | C                        | d <b>Pn</b> TP                         | 140 (130)                  | 0.10 (0.05)                          | $7.1 \times 10^2$                             |
| 10 <sup>a</sup> | T                        | d <b>Pn</b> TP                         | 140 (40)                   | 2.9 (0.6)                            | $2.1 \times 10^4$                             |
| 11 <sup>a</sup> | <b>Ds</b>                | d <b>Pa</b> TP                         | 340 (150)                  | 21 (3)                               | $6.2 \times 10^4$                             |
| 12 <sup>a</sup> | <b>Ds</b>                | d <b>Ds</b> TP                         | 8.0 (3.9)                  | 1.6 (0.1)                            | $2.0 \times 10^5$                             |
| 13 <sup>a</sup> | <b>Ds</b>                | dATP                                   | 150 (40)                   | 0.36 (0.09)                          | $2.4 \times 10^3$                             |
| 14 <sup>a</sup> | <b>Ds</b>                | dGTP                                   | n.d. <sup>d</sup>          | n.d. <sup>d</sup>                    | - <sup>d</sup>                                |
| 15 <sup>a</sup> | <b>Ds</b>                | dCTP                                   | 410 (190)                  | 0.34 (0.05)                          | $8.3 \times 10^2$                             |
| 16 <sup>a</sup> | <b>Ds</b>                | dTTP                                   | 220 (20)                   | 0.41 (0.17)                          | $1.9 \times 10^3$                             |
| 17 <sup>a</sup> | A                        | dTTP                                   | 0.70 (0.40)                | 2.8 (1.5)                            | $4.0 \times 10^6$                             |
| 18 <sup>a</sup> | A                        | dCTP                                   | 1200 (600)                 | 2.2 (0.9)                            | $1.8 \times 10^3$                             |
| 19 <sup>a</sup> | G                        | dCTP                                   | 0.24 (0.18)                | 5.5 (1.7)                            | $2.3 \times 10^7$                             |
| 20 <sup>a</sup> | G                        | dTTP                                   | 140 (70)                   | 0.29 (0.12)                          | $2.1 \times 10^3$                             |

Assays (Entries 1-5) were carried at 37°C for 1-28.2 min using 1 or 5  $\mu\text{M}$  template-primer duplex, 2-20 nM enzyme, and 6-600  $\mu\text{M}$  nucleoside triphosphate in a solution (10  $\mu\text{l}$ ) containing 50 mM Tris-HCl (pH 7.5), 10 mM MgCl<sub>2</sub>, 1 mM DTT, and 0.05 mg/ml bovine serum albumin. Each parameter was averaged from three to five data sets. <sup>a</sup>The parameters were derived from the previous data (Entries 6-19, *Nature Methods*, **3**, 729-735, 2006 & *J. Am. Chem. Soc.*, **129**, 15549-15555, 2007). <sup>b</sup>Standard deviations are given in parentheses. <sup>c</sup>The units of this term are %  $\text{min}^{-1} \cdot \text{M}^{-1}$ . <sup>d</sup>Reaction was too slow to calculate parameters ( $V_{\max} < 0.05$ ).

## Results

These results indicate the high efficiency and selectivity of the **Ds-Px** pairing in replication. The incorporation efficiency of NH<sub>2</sub>-hx-**Px** opposite **Ds** ( $V_{\max}/K_M = 7.4 \times 10^5$  % $\cdot\text{min}^{-1}\cdot\text{M}^{-1}$ ) was higher than those of **Pa** ( $V_{\max}/K_M = 6.2 \times 10^4$  % $\cdot\text{min}^{-1}\cdot\text{M}^{-1}$ ) and **Pn** ( $V_{\max}/K_M = 3.7 \times 10^5$  % $\cdot\text{min}^{-1}\cdot\text{M}^{-1}$ ) opposite **Ds**, and the efficiency of the **Ds-Px** pairing was also superior to those of the non-cognate pairings, especially the **Ds-Ds** pairing ( $V_{\max}/K_M = 2.0 \times 10^5$  % $\cdot\text{min}^{-1}\cdot\text{M}^{-1}$ ).

## Supplementary Table 2. Sequences of chemically synthesized DNA fragments

### Primers for Sequencing and PCR

5'-Primer for *in vitro* selection (20-mer)

5'-GATAATACGACTCACTATAG-3'

5'-Primer for PCR (40-mer)

5'-CGTTGTAAAACGACGGCCAGGATAATACGACTCACTATAG-3'

Primer for sequencing of PCR products (20-mer)

5'-CGTTGTAAAACGACGGCCAG-3'

3'-Primer for *in vitro* selection and PCR (24-mer)

5'-TTTCACACAGGAAACAGCTATGAC-3'

### DNA fragments (55-mer, the primer regions are underlined.)

#### Ds-Library

5'-TTTCACACAGGAAACAGCTATGACGGNNNDsNNNCCCTATAGTGAGTCGTATTA  
TC-3'

#### DNA S1

5'-TTTCACACAGGAAACAGCTATGACGGCACDsTTGCCCTATAGTGAGTCGTATTA  
TC-3'

#### DNA S2

5'-TTTCACACAGGAAACAGCTATGACGGCCDsTTGCCCTATAGTGAGTCGTATTA  
TC-3'

#### DNA S3

5'-TTTCACACAGGAAACAGCTATGACGGCGDsTTGCCCTATAGTGAGTCGTATTA  
TC-3'

#### DNA S4

5'-TTTCACACAGGAAACAGCTATGACGGTACDsTTGCCCTATAGTGAGTCGTATTA  
TC-3'

#### DNA S5

5'-TTTCACACAGGAAACAGCTATGACGGCACDsTCGCCCTATAGTGAGTCGTATTA  
TC-3'

#### DNA S6

5'-TTTCACACAGGAAACAGCTATGACGGTGCDsTTGCCCTATAGTGAGTCGTATTA  
TC-3'

#### DNA S7

5'-TTTCACACAGGAAACAGCTATGACGGTACDsTCGCCCTATAGTGAGTCGTATTA  
TC-3'

#### DNA S8

5'-TTTCACACAGGAAACAGCTATGACGGATCDsTATCCCTATAGTGAGTCGTATTA  
TC-3'

#### DNA N9

5'-TTTCACACAGGAAACAGCTATGACGGTACDsTTCCCCCTATAGTGAGTCGTATTA  
TC-3'

#### DNA N10

5'-TTTCACACAGGAAACAGCTATGACGGTAGDsTTGCCCTATAGTGAGTCGTATTA

TC-3'

**DNA N11**

5'-TTTCACACAGGAAACAGCTATGACGG**ATGDsAAC**CCCTATAGTGAGTCGTATTA  
TC-3'

**DNA N12**

5'-TTTCACACAGGAAACAGCTATGACGG**TACDsGTG**CCCTATAGTGAGTCGTATTA  
TC-3'

**DNA Cont**

5'-TTTCACACAGGAAACAGCTATGACGG**ATCCATT**CCCTATAGTGAGTCGTATTAT  
C-3'

**DNA Cont2**

5'-TTTCACACAGGAAACAGCTATGAC**ACATGGA**ACTGCTATAGTGAGTCGTATTAT  
C-3'

**DNA Cont3**

5'-TTTCACACAGGAAACAGCTATGAC**CATGATGCAG**ACTATAGTGAGTCGTATTAT  
C-3'

**DNA Cont4**

5'-TTTCACACAGGAAACAGCTATGAC**TTGATCCGTAT**CTATAGTGAGTCGTATTAT  
C-3'

**DNA fragments containing two Ds bases: (the primer regions are underlined.)**

DNA2-60 (60-mer)

5'-TTTCACACAGGAAACAGCTATGACGG**CCCDsTTACDsGTG**CCCTATAGTGAGTCG  
TATTATC-3'

DNA2-62 (62-mer)

5'-TTTCACACAGGAAACAGCTATGACGG**CCCDsTTGTACDsGTG**CCCTATAGTGAGT  
CGTATTATC-3'

DNA2-65 (65-mer)

5'-TTTCACACAGGAAACAGCTATGACGG**CCCDsTTGTAACDsGTG**CCCTATAGTG  
AGTCGTATTATC-3'

DNA2-68 (68-mer)

5'-TTTCACACAGGAAACAGCTATGACGG**CCCDsTTGTAACGATACDsGTG**CCCTATA  
GTGAGTCGTATTATC-3'

**Supplementary Table 3. PCR amplification of DNA fragments involving the Ds-Px pair**

| DNA     | 3'-nnn Ds nnn-5' <sup>a</sup> | Number of clones<br>isolated from the 5th<br>round of selection | Fold amplification          |                               |
|---------|-------------------------------|-----------------------------------------------------------------|-----------------------------|-------------------------------|
|         |                               |                                                                 | PCR: 15 cycles              | PCR: 30 cycles                |
|         |                               |                                                                 | Input: 15 fmol <sup>b</sup> | Input: 0.15 amol <sup>c</sup> |
| S1      | GTT Ds CAC                    | 3                                                               | $3.3 \times 10^2$           | -                             |
| S2      | GTT Ds CCC                    | 4                                                               | $3.4 \times 10^2$           | $2.1 \times 10^7$             |
| S3      | GTT Ds CGC                    | 2                                                               | $3.1 \times 10^2$           | -                             |
| S4      | GTT Ds CAT                    | 3                                                               | $3.2 \times 10^2$           | $1.7 \times 10^7$             |
| S5      | GCT Ds CAC                    | 2                                                               | $3.2 \times 10^2$           | -                             |
| S6      | GTT Ds CGT                    | 3                                                               | $3.3 \times 10^2$           | -                             |
| S7      | GCT Ds CAT                    | 1                                                               | $2.9 \times 10^2$           | $8.0 \times 10^6$             |
| S8      | TAT Ds CTA                    | 2                                                               | $2.9 \times 10^2$           | -                             |
| N9      | CTT Ds CAT                    | 0                                                               | $2.0 \times 10^2$           | -                             |
| N10     | GTT Ds GAT                    | 0                                                               | $1.3 \times 10^2$           | -                             |
| N11     | CAA Ds GTA                    | 0                                                               | 33                          | -                             |
| N12     | GTG Ds CAT                    | 0                                                               | $3.3 \times 10^2$           | -                             |
| Library | NNN Ds NNN                    | -                                                               | $1.9 \times 10^2$           | -                             |
| Cont    | TTA C CTA                     | 0                                                               | $7.1 \times 10^2$           | $3.9 \times 10^7$             |

- a) Bases with conserved ratios of more than 35% in the sequences of the 66 clones are colored red.
- b) The fold amplification of each single-stranded DNA fragment (initial amount = 15 fmol) after 15 cycles of PCR using FAM-hx-dPxTP and dDsTP.
- c) The fold amplification of each single-stranded DNA fragment (initial amount = 0.15 amol) after 30 cycles of PCR using FAM-hx-dPxTP and dDsTP.

## Supplementary Figure 1. Selected sequences of 66 clones obtained from the library after five rounds of *in vitro* selection

The sequences of the Px-containing DNA strands are listed. The number of clones is shown in parentheses, and the sequences for more than one clone are underlined. The DNA sequences shown in Table S3 are indicated in brackets.

5' -GATAATACGACTCACTATAGGG-NNN Px NNN-CCGTCATAGCTGTTTCCTGTGTGAAA-3'  
(total 66 clones)

|     |                               |            |   |            |                                   |      |
|-----|-------------------------------|------------|---|------------|-----------------------------------|------|
| (4) | <u>GATAATACGACTCACTATAGGG</u> | <u>CAA</u> | X | <u>GGG</u> | CCGTCATAGCTGTTTCCTGTGTGAAA        | [S2] |
| (1) | GATAATACGACTCACTATAGGG        | TAA        | X | GGG        | CCGTCATAGCTGTTTCCTGTGTGAAA        |      |
| (1) | GATAATACGACTCACTATAGGG        | CAA        | X | GGT        | CCGTCATAGCTGTTTCCTGTGTGAAA        |      |
| (3) | <u>GATAATACGACTCACTATAGGG</u> | <u>CAA</u> | X | <u>GTG</u> | <u>CCGTCATAGCTGTTTCCTGTGTGAAA</u> | [S1] |
| (2) | <u>GATAATACGACTCACTATAGGG</u> | <u>CAA</u> | X | <u>GCG</u> | <u>CCGTCATAGCTGTTTCCTGTGTGAAA</u> | [S3] |
| (1) | GATAATACGACTCACTATAGGG        | CAA        | X | GTC        | CCGTCATAGCTGTTTCCTGTGTGAAA        |      |
| (3) | <u>GATAATACGACTCACTATAGGG</u> | <u>CAA</u> | X | <u>GTA</u> | <u>CCGTCATAGCTGTTTCCTGTGTGAAA</u> | [S4] |
| (3) | <u>GATAATACGACTCACTATAGGG</u> | <u>CAA</u> | X | <u>GCA</u> | <u>CCGTCATAGCTGTTTCCTGTGTGAAA</u> | [S6] |
| (1) | GATAATACGACTCACTATAGGG        | GAA        | X | GAG        | CCGTCATAGCTGTTTCCTGTGTGAAA        |      |
| (1) | GATAATACGACTCACTATAGGG        | CCA        | X | GTG        | CCGTCATAGCTGTTTCCTGTGTGAAA        |      |
| (1) | GATAATACGACTCACTATAGGG        | CCA        | X | GAG        | CCGTCATAGCTGTTTCCTGTGTGAAA        |      |
| (1) | GATAATACGACTCACTATAGGG        | ACA        | X | GGG        | CCGTCATAGCTGTTTCCTGTGTGAAA        |      |
| (1) | GATAATACGACTCACTATAGGG        | CCA        | X | GAC        | CCGTCATAGCTGTTTCCTGTGTGAAA        |      |
| (1) | GATAATACGACTCACTATAGGG        | GCA        | X | GAC        | CCGTCATAGCTGTTTCCTGTGTGAAA        |      |
| (1) | GATAATACGACTCACTATAGGG        | CCA        | X | GCA        | CCGTCATAGCTGTTTCCTGTGTGAAA        |      |
| (1) | GATAATACGACTCACTATAGGG        | AGA        | X | GCA        | CCGTCATAGCTGTTTCCTGTGTGAAA        |      |
| (1) | GATAATACGACTCACTATAGGG        | TGA        | X | GCA        | CCGTCATAGCTGTTTCCTGTGTGAAA        |      |
| (2) | <u>GATAATACGACTCACTATAGGG</u> | <u>CGA</u> | X | <u>GTG</u> | <u>CCGTCATAGCTGTTTCCTGTGTGAAA</u> | [S5] |
| (1) | GATAATACGACTCACTATAGGG        | TGA        | X | GTG        | CCGTCATAGCTGTTTCCTGTGTGAAA        |      |
| (1) | GATAATACGACTCACTATAGGG        | GGA        | X | GTG        | CCGTCATAGCTGTTTCCTGTGTGAAA        |      |
| (1) | GATAATACGACTCACTATAGGG        | AGA        | X | GTG        | CCGTCATAGCTGTTTCCTGTGTGAAA        |      |
| (1) | GATAATACGACTCACTATAGGG        | CGA        | X | GTA        | CCGTCATAGCTGTTTCCTGTGTGAAA        | [S7] |
| (2) | <u>GATAATACGACTCACTATAGGG</u> | <u>CGA</u> | X | <u>GGG</u> | <u>CCGTCATAGCTGTTTCCTGTGTGAAA</u> |      |
| (1) | GATAATACGACTCACTATAGGG        | AGA        | X | GTA        | CCGTCATAGCTGTTTCCTGTGTGAAA        |      |
| (1) | GATAATACGACTCACTATAGGG        | CGA        | X | GCG        | CCGTCATAGCTGTTTCCTGTGTGAAA        |      |
| (1) | GATAATACGACTCACTATAGGG        | GGA        | X | GCG        | CCGTCATAGCTGTTTCCTGTGTGAAA        |      |
| (2) | <u>GATAATACGACTCACTATAGGG</u> | <u>GGA</u> | X | <u>GGG</u> | <u>CCGTCATAGCTGTTTCCTGTGTGAAA</u> |      |
| (1) | GATAATACGACTCACTATAGGG        | AGA        | X | GGG        | CCGTCATAGCTGTTTCCTGTGTGAAA        |      |
| (1) | GATAATACGACTCACTATAGGG        | GGA        | X | GAG        | CCGTCATAGCTGTTTCCTGTGTGAAA        |      |
| (1) | GATAATACGACTCACTATAGGG        | CGA        | X | GAG        | CCGTCATAGCTGTTTCCTGTGTGAAA        |      |
| (1) | GATAATACGACTCACTATAGGG        | CGA        | X | AGG        | CCGTCATAGCTGTTTCCTGTGTGAAA        |      |
| (2) | <u>GATAATACGACTCACTATAGGG</u> | <u>ATA</u> | X | <u>GAT</u> | <u>CCGTCATAGCTGTTTCCTGTGTGAAA</u> | [S8] |
| (1) | GATAATACGACTCACTATAGGG        | GTA        | X | GAT        | CCGTCATAGCTGTTTCCTGTGTGAAA        |      |
| (1) | GATAATACGACTCACTATAGGG        | ATA        | X | GCG        | CCGTCATAGCTGTTTCCTGTGTGAAA        |      |
| (1) | GATAATACGACTCACTATAGGG        | ATA        | X | GTG        | CCGTCATAGCTGTTTCCTGTGTGAAA        |      |
| (1) | GATAATACGACTCACTATAGGG        | ATA        | X | GGC        | CCGTCATAGCTGTTTCCTGTGTGAAA        |      |
| (1) | GATAATACGACTCACTATAGGG        | ATA        | X | GGA        | CCGTCATAGCTGTTTCCTGTGTGAAA        |      |
| (1) | GATAATACGACTCACTATAGGG        | TTA        | X | GCT        | CCGTCATAGCTGTTTCCTGTGTGAAA        |      |
| (1) | GATAATACGACTCACTATAGGG        | ATA        | X | AAC        | CCGTCATAGCTGTTTCCTGTGTGAAA        |      |
| (1) | GATAATACGACTCACTATAGGG        | AAA        | X | AAC        | CCGTCATAGCTGTTTCCTGTGTGAAA        |      |
| (1) | GATAATACGACTCACTATAGGG        | AAA        | X | ACT        | CCGTCATAGCTGTTTCCTGTGTGAAA        |      |
| (2) | <u>GATAATACGACTCACTATAGGG</u> | <u>GGA</u> | X | <u>ACG</u> | <u>CCGTCATAGCTGTTTCCTGTGTGAAA</u> |      |
| (1) | GATAATACGACTCACTATAGGG        | TGA        | X | ATG        | CCGTCATAGCTGTTTCCTGTGTGAAA        |      |
| (1) | GATAATACGACTCACTATAGGG        | CCA        | X | ACG        | CCGTCATAGCTGTTTCCTGTGTGAAA        |      |
| (1) | GATAATACGACTCACTATAGGG        | TGA        | X | CAT        | CCGTCATAGCTGTTTCCTGTGTGAAA        |      |
| (1) | GATAATACGACTCACTATAGGG        | CAA        | X | TAA        | CCGTCATAGCTGTTTCCTGTGTGAAA        |      |
| (1) | GATAATACGACTCACTATAGGG        | TAC        | X | ACG        | CCGTCATAGCTGTTTCCTGTGTGAAA        |      |
| (1) | GATAATACGACTCACTATAGGG        | TCC        | X | GAC        | CCGTCATAGCTGTTTCCTGTGTGAAA        |      |
| (1) | GATAATACGACTCACTATAGGG        | CCC        | X | TTC        | CCGTCATAGCTGTTTCCTGTGTGAAA        |      |
| (1) | GATAATACGACTCACTATAGGG        | GAT        | X | ACA        | CCGTCATAGCTGTTTCCTGTGTGAAA        |      |
| (1) | GATAATACGACTCACTATAGGG        | CAT        | X | TAT        | CCGTCATAGCTGTTTCCTGTGTGAAA        |      |
